# Supplementary material
Source: publisher site journal article supplement (https://www.dovepress.com/article/388535)
Supplement: Supplementary file 1 [file get_supplementary_file.php]

Supplementary data

| **Supplementary** **Table S1**. The associations of the seven PSQI components with hypertension in males and females | | | | | |
| --- | --- | --- | --- | --- | --- |
| PSQI components | Un-adjusted | |  | Adjusted* | |
| OR† (95%) | *P* | OR† (95%) | *P* |
| Males |  |  |  |  |  |
| Subjective sleep quality | 1.29 (1.14-1.46) | <0.001 |  | 1.22 (1.05-1.42) | 0.008 |
| Sleep latency | 1.19(1.07-1.33) | 0.001 |  | 1.26 (1.11-1.43) | <0.001 |
| Sleep duration | 1.02 (0.92-1.13) | 0.691 |  | 0.96 (0.85-1.09) | 0.550 |
| Habitual sleep efficiency | 0.99 (0.89-1.10) | 0.834 |  | 1.01 (0.89-1.15) | 0.837 |
| Sleep disturbances | 1.93 (1.66-2.26) | <0.001 |  | 1.32 (1.10-1.59) | 0.003 |
| Use of sleeping medication | 1.36 (1.09-1.71) | 0.007 |  | 1.05 (0.82-1.35) | 0.707 |
| Daytime dysfunction | 1.00 (0.89-1.11) | 0.931 |  | 1.10 (0.96-1.26) | 0.179 |
| Females |  |  |  |  |  |
| Subjective sleep quality | 1.33 (1.20-1.47) | <0.001 |  | 1.13 (1.00-1.28) | 0.045 |
| Sleep latency | 1.17(1.08-1.27) | <0.001 |  | 1.02 (0.93-1.13) | 0.637 |
| Sleep duration | 1.14 (1.04-1.25) | 0.004 |  | 1.02 (0.91-1.14) | 0.731 |
| Habitual sleep efficiency | 1.15 (1.05-1.27) | 0.004 |  | 1.08 (0.96-1.22) | 0.190 |
| Sleep disturbances | 1.74 (1.53-1.98) | <0.001 |  | 1.09 (0.94-1.28) | 0.257 |
| Use of sleeping medication | 1.45 (1.26-1.66) | <0.001 |  | 1.04 (0.85-1.23) | 0.613 |
| Daytime dysfunction | 0.97 (0.88-1.05) | 0.428 |  | 1.09 (0.97-1.21) | 0.139 |
| *Adjusting for age, education level, current smoking, current drinking, physical activity, body mass index, glucose, low- and high-density lipoprotein cholesterol.  †Odds ratio of hypertension associated with per point increment in the corresponding scores.  PSQI: Pittsburgh sleep quality index. | | | | | |

| **Supplementary Table S2**. Sensitivity test for the associations of the seven PSQI components with hypertension | | | | | |
| --- | --- | --- | --- | --- | --- |
| PSQI components | Un-adjusted | |  | Adjusted* | |
| OR† (95%) | *P* | OR† (95%) | *P* |
| Individuals with CHD excluded |  |  |  |  |  |
| Subjective sleep quality | 1.23 (1.14-1.34) | <0.001 |  | 1.18 (1.07-1.30) | 0.001 |
| Sleep latency | 1.11 (1.04-1.19) | 0.001 |  | 1.11 (1.02-1.20) | 0.012 |
| Sleep duration | 1.06 (0.99-1.14) | 0.109 |  | 0.99 (0.91-1.08) | 0.792 |
| Habitual sleep efficiency | 1.05 (0.98-1.13) | 0.172 |  | 1.03 (0.94-1.13) | 0.512 |
| Sleep disturbances | 1.70 (1.54 -1.88) | <0.001 |  | 1.16(1.03-1.31) | 0.017 |
| Use of sleeping medication | 1.34 (1.18-1.51) | <0.001 |  | 1.05 (0.91-1.10) | 0.526 |
| Daytime dysfunction | 0.94 (0.88-1.01) | 0.079 |  | 1.10 (1.00-1.20) | 0.045 |
| Individuals with stroke excluded |  |  |  |  |  |
| Subjective sleep quality | 1.24 (1.14-1.34) | <0.001 |  | 1.16 (1.06-1.28) | 0.002 |
| Sleep latency | 1.12(1.05-1.19) | <0.001 |  | 1.10 (1.01-1.20) | 0.021 |
| Sleep duration | 1.06 (0.99-1.14) | 0.079 |  | 0.99 (0.91-1.08) | 0.810 |
| Habitual sleep efficiency | 1.06 (0.99-1.14) | 0.103 |  | 1.04 (0.95-1.13) | 0.435 |
| Sleep disturbances | 1.71 (1.55-1.89) | <0.001 |  | 1.17 (1.04-1.32) | 0.012 |
| Use of sleeping medication | 1.35 (1.19-1.52) | <0.001 |  | 1.04 (0.90-1.20) | 0.600 |
| Daytime dysfunction | 0.93 (0.87-1.00) | 0.042 |  | 1.07 (0.98-1.17) | 0.121 |
| Individuals with CKD excluded |  |  |  |  |  |
| Subjective sleep quality | 1.24 (1.14-1.34) | <0.001 |  | 1.16 (1.05-1.27) | 0.003 |
| Sleep latency | 1.12(1.05-1.19) | <0.001 |  | 1.09 (1.01-1.18) | 0.029 |
| Sleep duration | 1.07 (1.00-1.14) | 0.053 |  | 0.99 (0.91-1.08) | 0.864 |
| Habitual sleep efficiency | 1.07 (1.00-1.15) | 0.061 |  | 1.04 (0.96-1.14) | 0.335 |
| Sleep disturbances | 1.72 (1.56-1.90) | <0.001 |  | 1.16 (1.03-1.31) | 0.016 |
| Use of sleeping medication | 1.36 (1.21-1.53) | <0.001 |  | 1.05 (0.92-1.21) | 0.467 |
| Daytime dysfunction | 0.93 (0.87-1.00) | 0.045 |  | 1.07 (0.98-1.17) | 0.137 |
| Individuals with MT excluded |  |  |  |  |  |
| Subjective sleep quality | 1.25 (1.15-1.35) | <0.001 |  | 1.18 (1.07-1.29) | <0.001 |
| Sleep latency | 1.13(1.06-1.21) | <0.001 |  | 1.12 (1.03-1.21) | 0.005 |
| Sleep duration | 1.07 (1.00-1.15) | 0.053 |  | 1.00 (0.92-1.08) | 0.898 |
| Habitual sleep efficiency | 1.07 (1.00-1.15) | 0.060 |  | 1.05 (0.96-1.14) | 0.311 |
| Sleep disturbances | 1.75 (1.59-1.93) | <0.001 |  | 1.19 (1.06-1.34) | 0.004 |
| Use of sleeping medication | 1.38 (1.23-1.55) | <0.001 |  | 1.06 (0.93-1.22) | 0.394 |
| Daytime dysfunction | 0.95 (0.89-1.02) | 0.125 |  | 1.09 (1.00-1.19) | 0.051 |
| *Adjusting for age, sex, education level, current smoking, current drinking, physical activity, body mass index, glucose, low- and high-density lipoprotein cholesterol.  †Odds ratio of hypertension associated with per point increment in the corresponding scores. Malignant tumor  PSQI: Pittsburgh sleep quality index; CHD: Coronary heart disease; CKD: Chronic kidney disease; MT: Malignant tumor. | | | | | |
